# Supplementary material for: Enhancement of CO2 capture and separation of CO2/N2 using post-synthetic modified MIL-100(Fe)
Source: Royal Society of Chemistry journal article supplement (doi:10.1039/c9nj02258a), 2019-01-01
Supplement: c9nj02258a1.pdf [file c9nj02258a1.pdf]

## Supplementary material

### Enhancement of CO<sub>2</sub> capture and separation of CO<sub>2</sub>/N<sub>2</sub> using post-synthetic modified MIL-100(Fe)

Suresh Mutyala <sup>a,\*</sup>, Sobhy M. Yakout <sup>b,\*</sup>, Shebl S. Ibrahim <sup>b</sup>, Madhavi Jonnalagadda <sup>c</sup>,  
Harisekhar Mitta <sup>c</sup>

<sup>a</sup> Department of Chemistry and Key Laboratory for Preparation and Application of Ordered Structural Materials of Guangdong Province, Shantou University, Guangdong 515063, China.

<sup>b</sup> Department of Biochemistry, College of Science, King Saud University, P. O. Box 2455, Riyadh 11451, Saudi Arabia.

<sup>c</sup> Inorganic and Physical Chemistry Division, Indian Institute of Chemical Technology, Hyderabad 500007, India.

Corresponding authors: [sureshm186@gmail.com](mailto:sureshm186@gmail.com), [syakout@ksu.edu.sa](mailto:syakout@ksu.edu.sa)

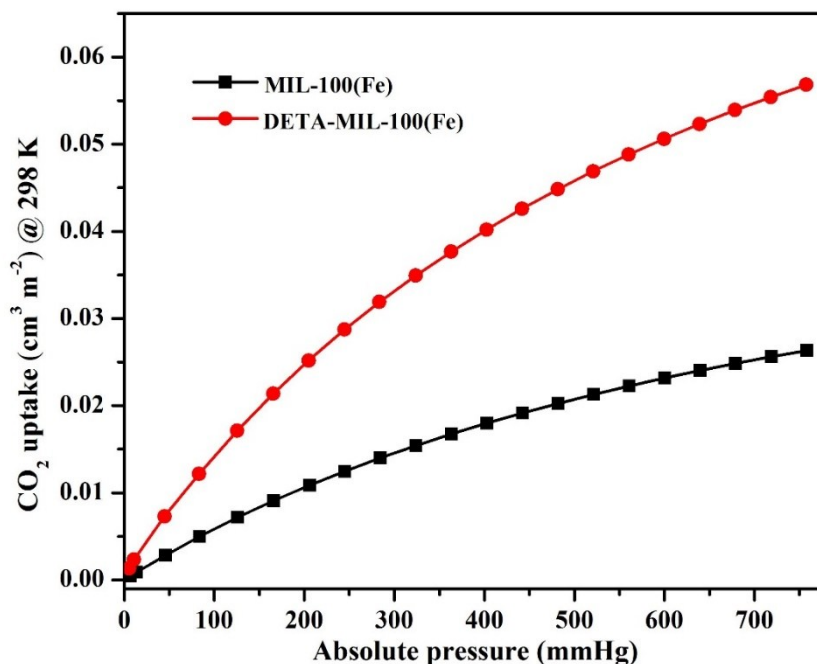

Fig. S1. CO<sub>2</sub> adsorption on the unit surface area of MIL-100(Fe) and DETA-MIL-100(Fe)

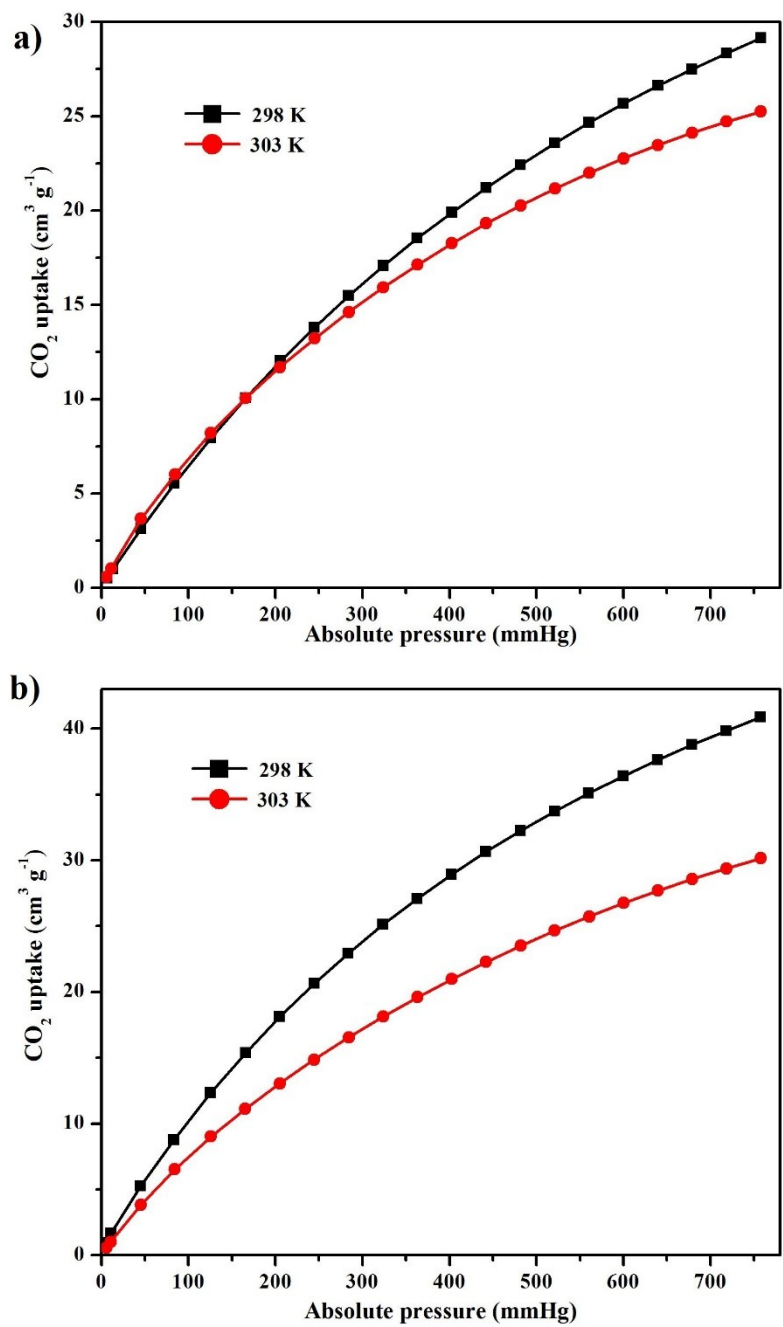

**Fig. S2.** CO<sub>2</sub> adsorption of a) MIL-100(Fe) and b) DETA-MIL-100(Fe) at different temperatures

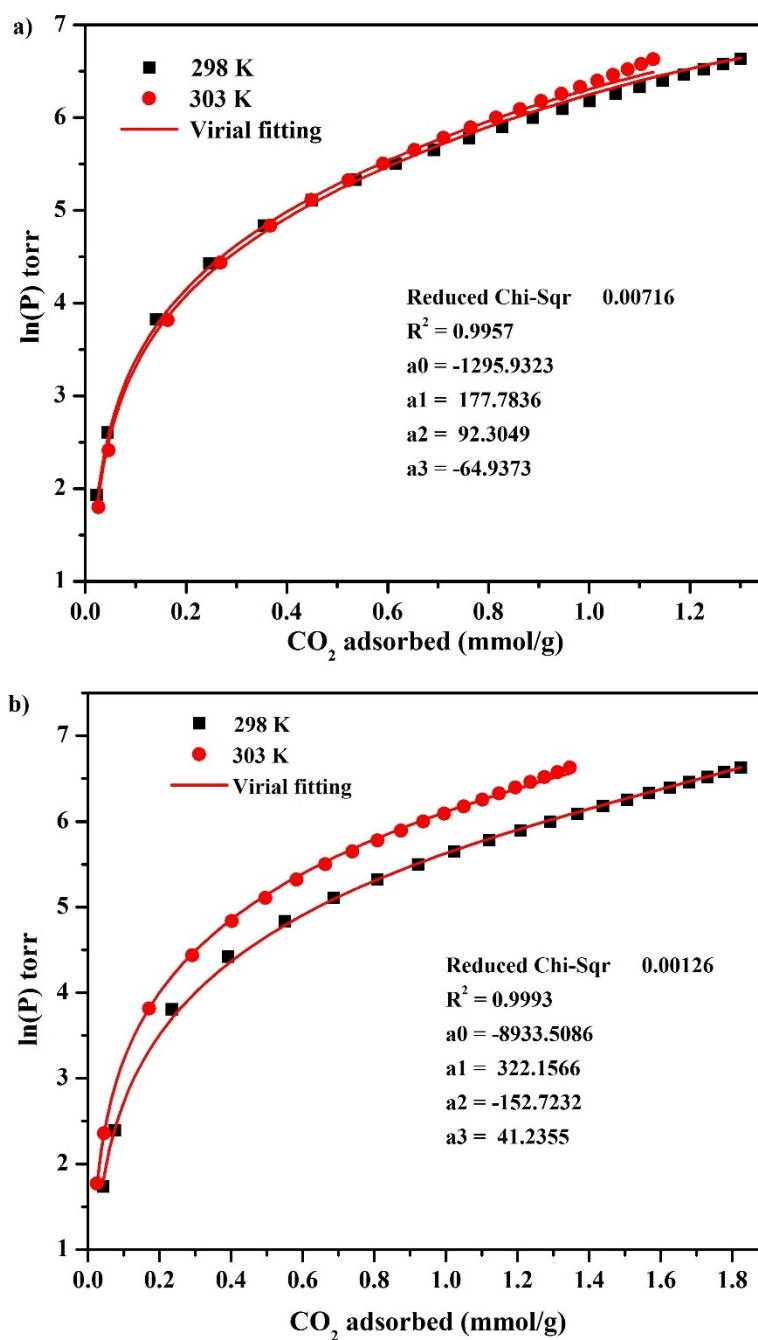

Fig. S3. Virial fitting of CO<sub>2</sub> adsorption isotherms of a) MIL-100(Fe) and b) DETA-MIL-100(Fe)
